# Supplementary material for: Depressive symptoms among Peruvian adult residents amidst a National Lockdown during the COVID-19 pandemic
Source: Springer Nature journal article supplement (doi:10.1186/s12888-021-03107-3), 2021-02-18
Supplement: MOESM1 [file 18879388]

## Questionnaire

**Have you previously participated in this survey?**

Yes

No

**The reason you're filling out the survey is:**

To send someone else's information

To correct my previous answers

To see the questions again

I'd rather not answer

Other (specify)

**Sex:**

Man

Woman

I'd rather not answer

**What's your age?**

18-24 years old

25-34 years old

35-44 years old

45-54 years old

55-64 years old

65-74 years old

75 years or older

**What's your marital status?**

Single

Married

Widower

Convivant

Other

**Are you complying with quarantine at home?**

Yes

No

I'd rather not answer

**As for where you slept yesterday, where are you located?**

Department

Province

District

**How many people, including you, slept in the same place where you stayed yesterday?**

*(Example: if you live it would only be 1)*

**How many people 60 years of age or older slept in the same place where you stayed yesterday, not including you?**

*(Example: if you are the only person in your 60s, put none)*

**Do you live in the same residence where you lived 6 months ago?**

Yes  
No  
I'd rather not answer

**Fill in the details of your previous residence:**

Department  
Province  
District

**Has your occupation been considered essential during quarantine?**

No, my occupation has not been regarded as essential  
Health services  
Communications  
Finance  
Police and Armed Forces  
Agricultural production or sale  
Pharmaceutical production or sale  
Other (specify)  
I'd rather not answer

**Has any household member been considered an essential worker?**

*Check all the options that apply.*

No, no one in my household has been considered an essential worker  
Health services  
Communications  
Finance  
Police and Armed Forces  
Agricultural production or sale  
Pharmaceutical production or sale  
Other (specify)  
I'd rather not answer

**What is the highest degree of education you have obtained or approved?**

Incomplete primary  
Full primary  
Incomplete high school  
Full high school  
Incomplete Technique or Superior  
Complete Technique or Superior  
No formal instruction  
Other (specify):  
I'd rather not answer

The following questions discuss your level of well-being and mental health.

In the last two weeks, what has been the biggest concern you've ever had?

Have you sought help or support from mental health services in the last two weeks (i.e., between [\\$-date://OtherDate/PT/-2%20week](#) and yesterday)?

- Yes
- No
- I'd rather not answer

Have you been diagnosed with any mental health problems in the past?

- Yes
- No
- I'd rather not answer

What was your diagnosis?

When was he diagnosed?

Have you had any contact with mental health services in the last two weeks (i.e. between [\\$date://OtherDate/PT/-2%20week](#) and yesterday)?

- Yes
- No
- I'd rather not answer

Point out the means by which you have contacted mental health services:

*Check all appropriate options.*

- Phone calls
- Text messages (Whatsapp, etc.)
- Video Conferencing (Internet)
- Other

Have you had any problems or challenges in accessing your mental health services in the last two weeks (i.e. between [\\$-date://OtherDate/PT/-2%20week-](#) and yesterday)?

*Check all applicable options.*

- Dating
- Recipes / Medicines
- Non-pharmacological therapies (counseling services, psychology, etc.)
- Periodic tracking (virtual or physical)
- Other (specify):
- I haven't had any problems.

What has been the biggest problem you've had with regard to mental health services in the last two weeks (between [\\$-date://OtherDate/PT/-2%20week-](#) and yesterday)?

How often over the past two weeks, i.e. between [\\$date://OtherDate/PT/-2%20week](#) and yesterday, you've felt discomfort or problems like:

|  | Not at all | Several days (1 to 6 days) | Most days (7 to 11 days) | Almost every day (12 to + days) | I'd rather not answer |
|--|------------|----------------------------|--------------------------|---------------------------------|-----------------------|
|  |            |                            |                          |                                 |                       |

Little desire or interest in doing things?

Feeling discouraged, depressed, sad, or hopeless?

**How often over the past two weeks, i.e. between \$date://OtherDate/PT/-2%20week and yesterday, you've felt discomfort or problems like:**

|                                                                                                             | Not at all | Several days (1 to 6 days) | Most days (7 to 11 days) | Almost every day (12 to + days) | I'd rather not answer |
|-------------------------------------------------------------------------------------------------------------|------------|----------------------------|--------------------------|---------------------------------|-----------------------|
| Problems sleeping or staying asleep, or sleeping too much?                                                  |            |                            |                          |                                 |                       |
| Feeling tired or having little energy for no reason to justify it?                                          |            |                            |                          |                                 |                       |
| Little appetite or overeating?                                                                              |            |                            |                          |                                 |                       |
| Difficulty paying attention or concentrating on the things you do?                                          |            |                            |                          |                                 |                       |
| Move slower or talk slower than normal or feel more restless or uneasy than normal?                         |            |                            |                          |                                 |                       |
| Thoughts that it would be better to be dead or that you wanted to hurt yourself in some way looking to die? |            |                            |                          |                                 |                       |
| Feel unwell about yourself or feel that you are a failed or that you have failed yourself or your family?   |            |                            |                          |                                 |                       |

**These inconveniences or problems, how much have you had difficulty doing your job, your activities at home or getting along with other people?**

A lot

Little

Nothing

I'd rather not answer

**The following questions discuss your health status.**

**Have you ever been diagnosed with COVID-19?**

Yes

No

I'd rather not answer

**Have you ever had a COVID-19 diagnostic test? (Molecular or rapid testing)**

Yes

No

I'd rather not answer

**Have you been in contact with anyone with COVID-19?**

Yes

No

I do not know

**In the last 24 hours, have you experienced any of the following symptoms?**

*Check all the alternatives that apply.*

Fever

Cough

Sore throat

Difficulty breathing

Muscle pain

Lack of taste or smell

Headache

Fatigue

Chest pain

Nausea

Eye pain

Nasal discharge

No symptoms

**Do you currently suffer from any of these diseases?**

*Check all that apply.*

Obesity

Arterial Hypertension

Another heart disease

Diabetes

Cancer

Immune Disease

No disease

**In the last two weeks, i.e. between [\\$date://OtherDate/PT/-2%20week](#) and yesterday, has your consumption increased by:**

|                           | Yes | No | I'd rather not answer |
|---------------------------|-----|----|-----------------------|
| Alcohol                   |     |    |                       |
| Tobacco and/or cigarettes |     |    |                       |

Other substances

**How often over the last two weeks, i.e. between \$date://OtherDate/PT/-2%20week and yesterday, you**

|                                                                                                                                                                                   | Always | Almost always | Sometimes | Rarely | Never | I'd rather not answer |
|-----------------------------------------------------------------------------------------------------------------------------------------------------------------------------------|--------|---------------|-----------|--------|-------|-----------------------|
| Did he feel so scared that nothing could calm him down?                                                                                                                           |        |               |           |        |       |                       |
| Were you so angry that you felt out of control?                                                                                                                                   |        |               |           |        |       |                       |
| Did he feel so disinterested in the things he used to like that he didn't feel like doing anything anymore?                                                                       |        |               |           |        |       |                       |
| Did you feel so hopeless that you didn't want to go on living?                                                                                                                    |        |               |           |        |       |                       |
| Did you feel so upset about the emergency or other event in your life that you tried to avoid places, people, conversations or activities that might remind you of such an event? |        |               |           |        |       |                       |
| felt unable to perform essential activities of daily life because of these feelings?                                                                                              |        |               |           |        |       |                       |

**Please complete the following information about ALL people 60 years of age or older who live with you.**

**During the last two weeks this person...**

|    | Age (years) | Sex     | ... felt so distressed/upset/annoyed that she was unable to carry out basic activities of daily life because of any of these feelings? | ... are you acting strangely or having seizures or seizures? |
|----|-------------|---------|----------------------------------------------------------------------------------------------------------------------------------------|--------------------------------------------------------------|
|    |             |         |                                                                                                                                        |                                                              |
| #1 |             | M ... F | If ... I'd rather not answer                                                                                                           | If ... I don't know.                                         |
| #2 |             | M ... F | If ... I'd rather not answer                                                                                                           | If ... I don't know.                                         |
| #3 |             | M ... F | If ... I'd rather not answer                                                                                                           | If ... I don't know.                                         |
| #4 |             | M ... F | If ... I'd rather not answer                                                                                                           | If ... I don't know.                                         |
| #5 |             | M ... F | If ... I'd rather not answer                                                                                                           | If ... I don't know.                                         |

**This last part researches socioeconomic information about you or your current home:**

**Are you the head of the household?**

Yes

No

**What is your link to the head of the household?**

Father/Mother

Husband

Child

Brother  
Other (specify):  
I'd rather not answer

**What was your employment situation before quarantine (before March 16, 2020)?**

Formal worker  
Informal work  
I didn't have a job.

**Did your work situation change during quarantine?**

Yes  
No

**What is your employment situation during quarantine (after March 16, 2020)?**

Formal work  
Informal work  
I don't have a job.

**Has your household received any financial or other assistance from the government?**

*Check all applicable options.*

Bonus "I stay home"  
Independent bonus  
Universal Family Bonus  
Bonus (essential professional)  
Food basket  
Pension 65  
Together  
Popular Dining Room  
Another kind of help  
I'd rather not answer  
I haven't received any help.

**Currently, what is your household's total monthly income? Enter the most appropriate category.**

*Total monthly income is the sum of the income of all household members.*

Up to 930 PEN  
Between 931 and 1860 PEN  
Between 1861 and 2790 PEN  
Between 2791 and 4650 PEN  
Between 4651 and 6510 PEN  
Between 6511 and 9300 PEN  
More than 9300 PEN  
I'd rather not answer

**Please put the figure corresponding to the total monthly income of your household, in PEN.**

***(example, 3050 for three thousand fifty PEN)***
